# Supplementary material
Source: publisher site journal article supplement (http://study.sagepub.com/sites/default/files/appendix_1c_visual-spatial_memory_grids.docx)

Appendix 1C: Visual-spatial Memory: Grids

| **6** |  |  |  |  | **5** |  |
| --- | --- | --- | --- | --- | --- | --- |
|  | **4** |  |  |  |  |
|  |  |  |  |  | **2** |

|  |  | **7** |  |  |  | **5** |
| --- | --- | --- | --- | --- | --- | --- |
| **9** |  |  |  | **1** |  |
|  | **4** |  |  | **6** |  |


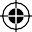


| **3** | **7** |  |  |  | **9** |  |
| --- | --- | --- | --- | --- | --- | --- |
|  |  | **0** | **8** |  | **1** |
| **8** |  |  | **5** |  |  |

| **3** |  | **5** |  | **4** | **1** |  |
| --- | --- | --- | --- | --- | --- | --- |
|  | **1** |  | **7** |  | **0** |
|  | **6** | **2** |  | **8** |  |


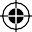


|  | **3** | **7** |  | **3** |  | **5** |
| --- | --- | --- | --- | --- | --- | --- |
| **9** |  | **1** | **0** | **1** |  |
| **6** | **4** |  |  | **6** | **2** |

| **3** | **7** | **2** |  |  | **9** | **4** |
| --- | --- | --- | --- | --- | --- | --- |
|  | **5** | **0** | **8** | **1** | **3** |
| **8** |  | **6** | **0** | **5** |  |

Supplement: Supplementary file 1 [file appendix_1c_visual-spatial_memory_grids.docx]
